# Supplementary material for: Integrated BiPO4 nanocrystal/BiOBr heterojunction for sensitive photoelectrochemical sensing of 4-chlorophenol
Source: Royal Society of Chemistry journal article supplement (doi:10.1039/c8dt02687d), 2018-01-01
Supplement: c8dt02687d1.pdf [file c8dt02687d1.pdf]

## Supporting Information

### **Integrated BiPO<sub>4</sub> nanocrystals/BiOBr heterojunction for sensitive photoelectrochemical sensing of 4-chlorophenol**

Li Xu<sup>a</sup>, Desheng Jiang<sup>a</sup>, Yu Zhao<sup>a</sup>, Pengcheng Yan<sup>a</sup>, Jintao Dong<sup>c</sup>, Junchao Qian<sup>b</sup>, Huaqin Ao<sup>a</sup>, Jiawen  
Li<sup>a</sup>, Cheng Yan<sup>b,\*</sup>, Henan Li<sup>a,b\*</sup>

<sup>a</sup> School of Chemistry and Chemical Engineering; Institute for Energy Research, Jiangsu University,  
Zhenjiang 212013, P. R. China

<sup>b</sup> School of Chemistry, Physics and Mechanical Engineering, Queensland University of Technology  
(QUT), Brisbane, QLD 4001, Australia.

<sup>c</sup> Jiangsu Key Laboratory for Environment Functional Materials, School of Environmental Science and  
Engineering, Suzhou University of Science and Technology, Suzhou 215009, P. R. China

\*Corresponding authors:

[c2.yan@qut.edu.au](mailto:c2.yan@qut.edu.au) (C. Yan)

[lhnl@ujs.edu.cn](mailto:lhnl@ujs.edu.cn) (H.N. Li)

According to the similar method (Experimental section), different mass ratios of BiPO<sub>4</sub>/BiOBr (5 wt% and 10 wt%) heterojunction was obtained, respectively. Furthermore, XRD analysis was used to characterize the crystal structure and phase of the prepared materials. Fig. S1a shows XRD patterns for BiPO<sub>4</sub>, BiOBr, and BiPO<sub>4</sub>/BiOBr heterojunction. It can be observed that all diffraction peaks of BiPO<sub>4</sub> were consistent with the standard peaks of monoclinic BiPO<sub>4</sub> (JCPDS, No., 15-0767)<sup>1</sup>. In XRD patterns of BiOBr, all typical diffraction peaks corresponded to the tetragonal BiOBr standard card (JCPDS, card, No., 09-0393). For BiPO<sub>4</sub>/BiOBr heterojunction, the diffraction peaks of BiPO<sub>4</sub> and BiOBr were both appeared. The high intensity and sharp diffraction peaks indicate that the prepared BiPO<sub>4</sub>/BiOBr heterojunction possessed a good crystallinity. No diffraction peak of other impurities existed in the XRD patterns, suggesting that BiPO<sub>4</sub>/BiOBr heterojunction was formed by coupling BiOBr and BiPO<sub>4</sub> with single phase.

In order to further analyze the composition of as-prepared materials, the samples were characterized by infrared spectroscopy. Fig. S1b shows the FT-IR spectra of BiOBr, BiPO<sub>4</sub>, and BiPO<sub>4</sub>/BiOBr heterojunction. Four typical absorption peaks were located ranging from 925 cm<sup>-1</sup> to 1100 cm<sup>-1</sup> in BiPO<sub>4</sub>/BiOBr heterojunction, ascribing to the stretching vibration of P-O<sup>2</sup>. There were three characteristic peaks at 600 cm<sup>-1</sup>, 535 cm<sup>-1</sup>, and 579 cm<sup>-1</sup>, respectively, corresponding to the flexural vibrations of delta (O-P-O) and O=P-O<sup>3</sup>, which was originated from BiPO<sub>4</sub> in BiPO<sub>4</sub>/BiOBr heterojunction. In addition, the characteristic absorption peaks of Bi-O bond originated from BiOBr appeared at 514cm<sup>-1</sup> in BiPO<sub>4</sub>/BiOBr heterojunction<sup>4</sup>. In a word, the typical absorption peaks of BiOBr and BiPO<sub>4</sub> were observed in the BiPO<sub>4</sub>/BiOBr heterojunction. The results of FT-IR suggest that BiPO<sub>4</sub>/BiOBr heterojunction was successfully prepared.

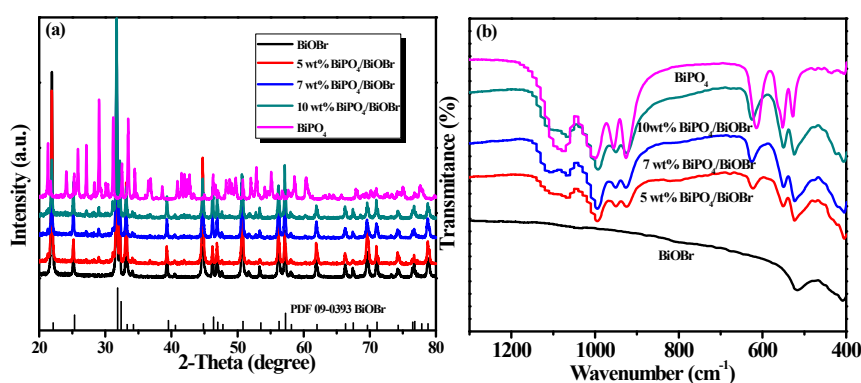

Fig. S1. XRD patterns (a) and FT-IR patterns (b) of BiOBr, BiPO<sub>4</sub> and all BiPO<sub>4</sub>/BiOBr heterojunction with different BiPO<sub>4</sub> contents.

The band gap energy ( $E_g$ ) of the BiOBr and BiPO<sub>4</sub> was calculated according to the formula:  $\alpha h\nu = A(h\nu - E_g)^{n/2}$ , respectively, where  $\alpha$ ,  $h$ ,  $\nu$ , and  $A$  stand for the absorption coefficient, Planck constant, light frequency, and a constant<sup>5</sup>. In addition, the  $n$  in the equation was depended on the characteristics of the transition in a semiconductor ( $n = 1$  for direct transition and  $n = 4$  for indirect transition). As previous literature reported, the  $n$  value of BiPO<sub>4</sub> and BiOBr was both 4<sup>6</sup>. The  $E_g$  of BiPO<sub>4</sub> and BiOBr was estimated to be 3.5 and 2.90 eV, respectively, from the plot of  $(\alpha h\nu)^2$  versus  $(h\nu)$  in Fig. S2b, which were close to those in some reported literatures<sup>6</sup>.

The photocurrent response of BiOBr/ITO, BiPO<sub>4</sub>/ITO and BiPO<sub>4</sub>/BiOBr/ITO was tested by repeated 10 times for 20 seconds at the potential of 0 V, respectively. As shown in Fig. S3, all BiPO<sub>4</sub>/BiOBr/ITO electrodes showed increased photocurrent, compared with BiOBr/ITO and BiPO<sub>4</sub>/ITO. The photocurrent of all electrodes did not change significantly after repeated irradiation. It shows that BiOBr/ITO, BiPO<sub>4</sub>/ITO and all BiPO<sub>4</sub>/BiOBr/ITO were relatively stable and suitable for constructing photoelectrochemical detection platform. The 7 wt% BiPO<sub>4</sub>/BiOBr/ITO exhibited the highest transient photocurrent response capability. Therefore, 7 wt% BiPO<sub>4</sub>/BiOBr/ITO electrode was used to construct PEC sensor.

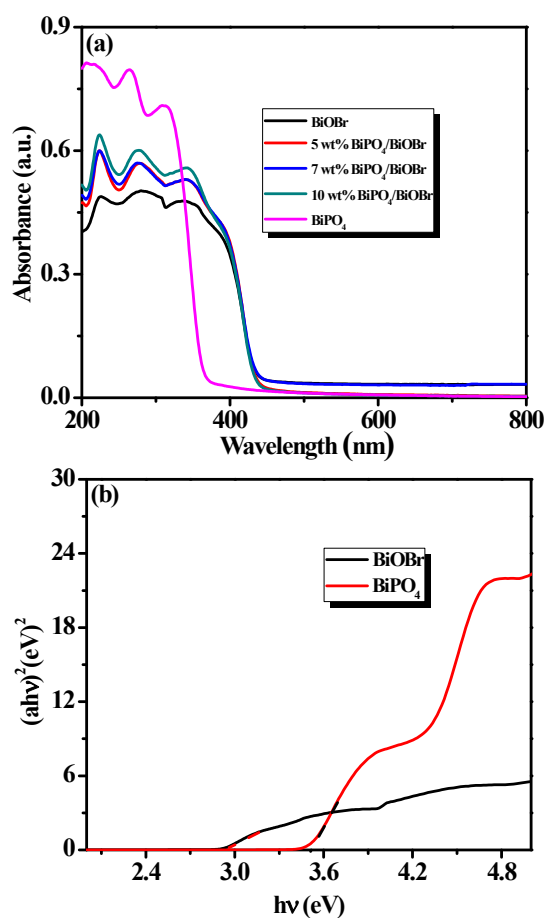

Fig. S2. (a) UV-vis diffused reflectance spectra of BiPO<sub>4</sub>/BiOBr heterojunction, BiPO<sub>4</sub> and BiOBr; (b) The band gap energy of BiPO<sub>4</sub> and BiOBr.

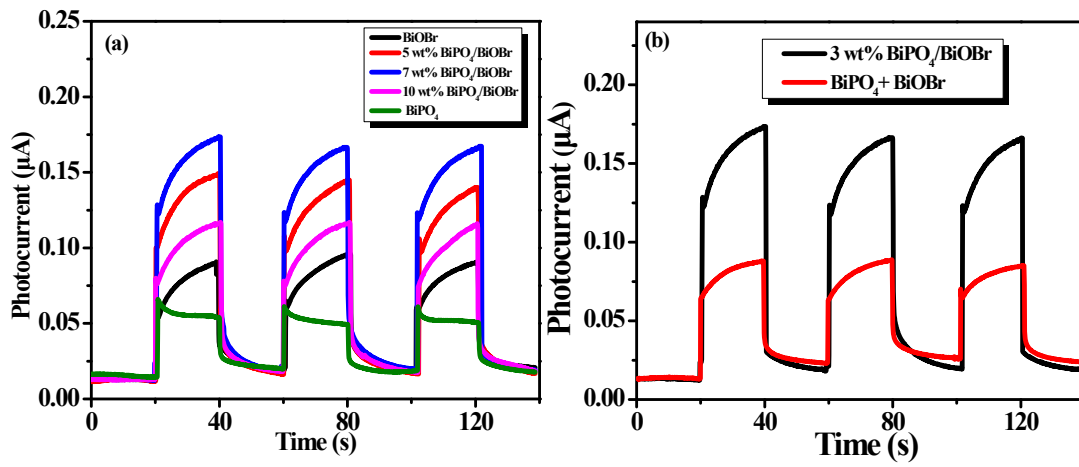

Fig. S3 (a) Transient photocurrent response for BiOBr, BiPO<sub>4</sub> and all BiPO<sub>4</sub>/BiOBr heterojunction; (b) Transient photocurrent response for 3 wt% BiPO<sub>4</sub>/BiOBr heterojunction and physical mixture of BiPO<sub>4</sub> and BiOBr at the same weight percent ratio.

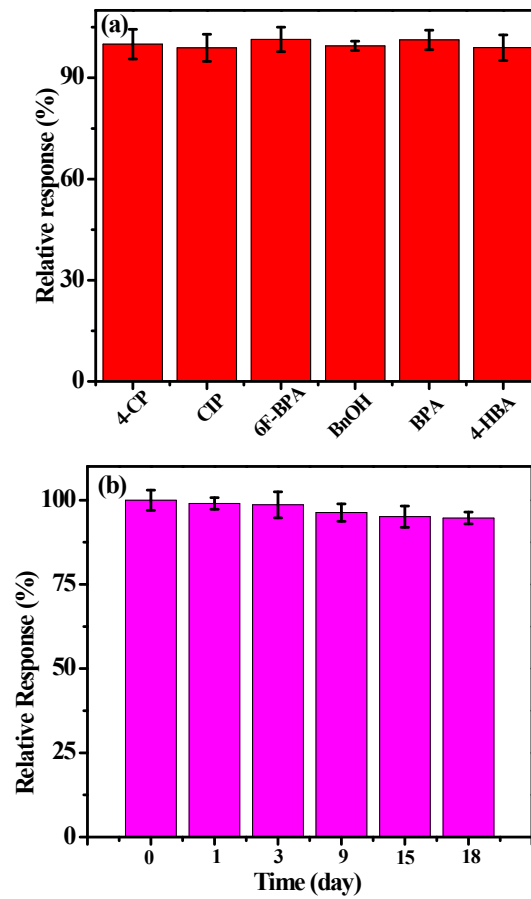

Fig. S4. (a) Influence of particular possible interfering substances on the responses of the photoelectrochemical sensor for 4-CP ( $80 \text{ ng mL}^{-1}$ ) in phosphate buffer solution ( $0.1 \text{ M}$ ,  $\text{pH } 7.0$ ); (b) Stability tests of photoelectrochemical sensor for detection of 4-CP ( $80 \text{ ng mL}^{-1}$ ).

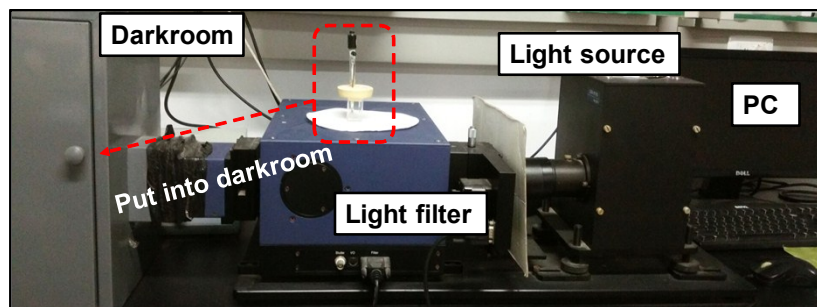

Figure S5. Photograph of PEC detection system.

Tab. S1 Comparison of proposed sensor with other previously reported sensors for 4-CP determination.

| Detection method                          | Linear range (ng mL <sup>-1</sup> )                                                        | Detection limit (ng mL <sup>-1</sup> ) | Reference |
|-------------------------------------------|--------------------------------------------------------------------------------------------|----------------------------------------|-----------|
| Differential pulse voltammetric detection | 1.03×10 <sup>2</sup> -1.29×10 <sup>5</sup>                                                 | 38.57                                  | 7         |
| Voltammetric detection                    | 38.56-5.14×10 <sup>5</sup>                                                                 | 14.14                                  | 8         |
| Differential pulse voltammetric detection | 1.28×10 <sup>4</sup> -3.85×10 <sup>5</sup>                                                 | 4.74×10 <sup>2</sup>                   | 9         |
| Amperometric detection                    | 3.21×10 <sup>2</sup> -5.14×10 <sup>3</sup> ;<br>8.04×10 <sup>3</sup> -1.51×10 <sup>4</sup> | 50.13                                  | 10        |
| Photoelectrochemical detection            | 8-2.40×10 <sup>3</sup>                                                                     | 3.75                                   | This work |

Tab. S2. PEC detection of 4-CP in real water samples by the proposed sensor.

| sample | 4-CP concentration (ng mL <sup>-1</sup> ) |         |          |       |
|--------|-------------------------------------------|---------|----------|-------|
|        | added                                     | found   | recovery | RSD   |
| 1      | 8.00                                      | 8.23    | 102.87%  | 3.60% |
| 2      | 80.00                                     | 82.19   | 102.73%  | 3.70% |
| 3      | 400.00                                    | 397.00  | 99.25%   | 2.40% |
| 4      | 1200.00                                   | 1193.20 | 99.41%   | 4.20% |
| 5      | 2000.00                                   | 1987.00 | 99.35%   | 2.8%  |

#### References

- 1 D. Liu, W.B. Cai, Y.G. Wang and Y.F. Zhu, *Appl. Catal., B* 2018, **236**, 205-211.
- 2 Y.F. Liu, Y.H. Lv, Y.Y. Zhu, D. Liu, R.L. Zong and Y.F. Zhu, *Appl. Catal., B* 2014, **147**, 851-857.
- 3 Y.Y. Zhu, Y.F. Liu, Y.H. Lv, Q. Ling, D. Liu and Y.F. Zhu, *J. Mater. Chem. A* 2014, **2**, 13041-13048.
- 4 J. Di, J.X. Xia, S. Yin, H. Xu, M.Q. He, H.M. Li, L. Xu and Y.P. Jiang, *RSC Adv.* 2013, **3**, 19624-19631.
- 5 Z. Mo, H. Xu, Z.G. Chen, X.J. She, Y.H. Song, P.C. Yan, Y.G. Xu, Y.C. Lei, S.Q. Yuan and H.M. Li, *Chin. J. Catal.* 2018, **39**, 760-770.
- 6 L. Xu, J.X. Xia, L.G. Wang, J. Qian, H.M. Li, K. Wang, K.Y. Sun and M.Q. He, *Chem. Eur. J.* 2014, **20**, 2244-2253.
- 7 B. Wang, O.K. Okoth, K. Yan and J.D. Zhang, *Sens. Actuators, B* 2016, **236**, 294-303.
- 8 L. Wang, Q. Sun, Y. Liu and Z.S. Lu, *RSC Adv.* 2016, **6**, 34692-34698.
- 9 X.L. Zhu, K.X. Zhang, D.W. Wang, D.M. Zhang, X. Yuan and J. Qu, *J. Electroanal. Chem.* 2018, **810**, 199-206.
- 10 C.C. Qiu, T. Chen, X. Wang, Y. Li and H.Y. Ma, *Colloids Surf. B.* 2013, **103**, 129-135.
